# Supplementary material for: Neural variability determines coding strategies for natural self-motion in macaque monkeys
Source: eLife journal article supplement (doi:10.7554/elife.57484), 2020-09-11
Supplement: supp [file elife-57484-supp-v1.zip]

Archive with 15 entries (15 files):
- elife_poa_e57484_Figure_1_figure_supplement_1.pdf
- elife_poa_e57484_Figure_1_figure_supplement_2.pdf
- elife_poa_e57484_Figure_2_figure_supplement_1.pdf
- elife_poa_e57484_Figure_2_figure_supplement_2.pdf
- elife_poa_e57484_Figure_2_figure_supplement_3.pdf
- elife_poa_e57484_Figure_2_figure_supplement_4.pdf
- elife_poa_e57484_Figure_2_figure_supplement_5.pdf
- elife_poa_e57484_Figure_2_figure_supplement_6.pdf
- elife_poa_e57484_Figure_2_figure_supplement_7.pdf
- elife_poa_e57484_Figure_3_figure_supplement_1.pdf
- elife_poa_e57484_Figure_3_figure_supplement_2.pdf
- elife_poa_e57484_Figure_4_figure_supplement_1.pdf
- elife_poa_e57484_Figure_4_figure_supplement_2.pdf
- elife_poa_e57484_Figure_4_figure_supplement_3.pdf
- elife_poa_e57484_Transparent_Reporting_File.pdf
