# Supplementary material for: Neural variability determines coding strategies for natural self-motion in macaque monkeys
Source: eLife journal article supplement (doi:10.7554/elife.57484), 2020-09-11

Figure 2- figure supplement 4

A

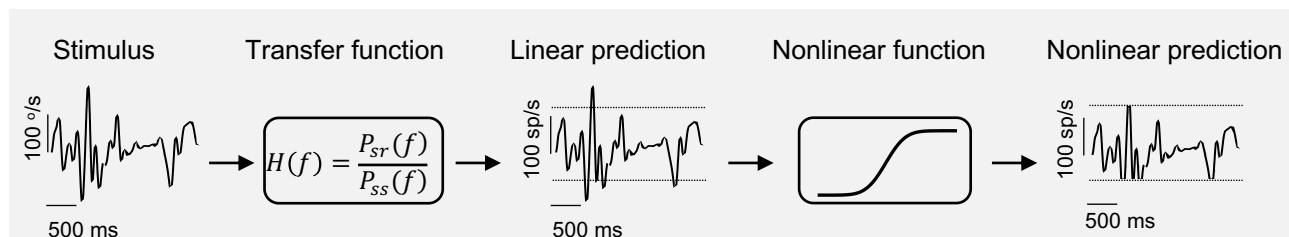

Predicted firing rate power

Variability power

Predicted response power

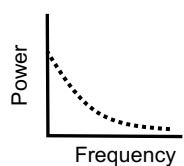

+

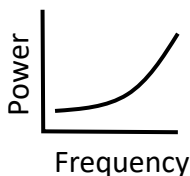

=

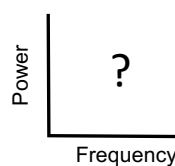

B

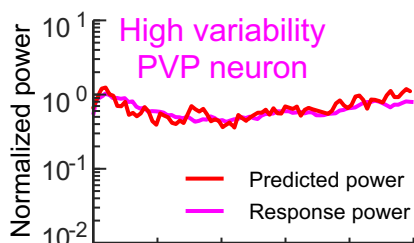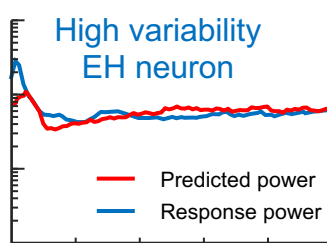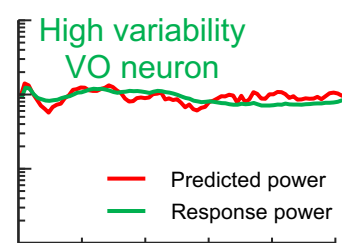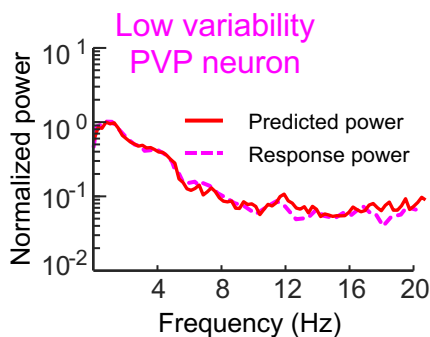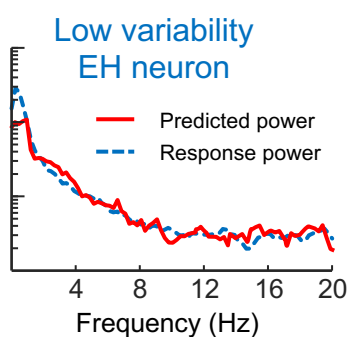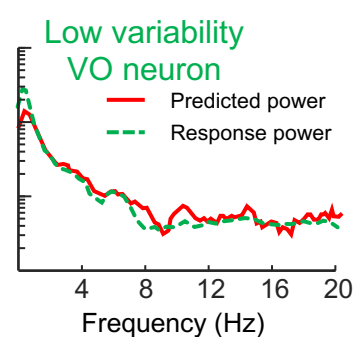

C

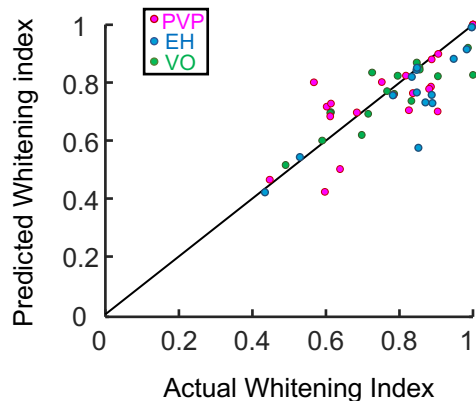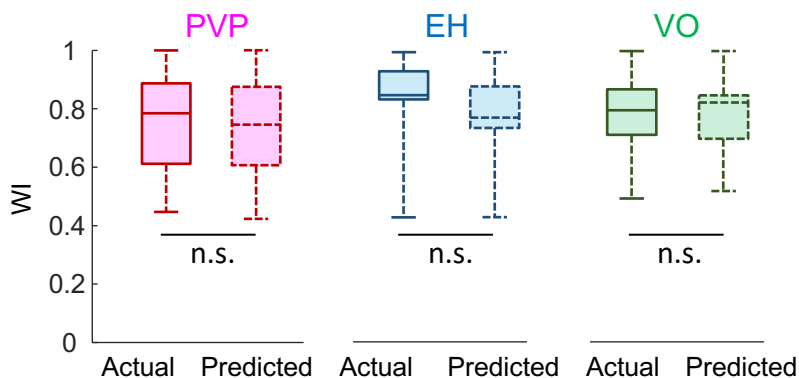

Supplement: supp [file elife-57484-supp-v1.zip › elife_poa_e57484_Figure_2_figure_supplement_4.pdf]
