# Supplementary figures and images for: Neural variability determines coding strategies for natural self-motion in macaque monkeys
Source: eLife journal article supplement (doi:10.7554/elife.57484), 2020-09-11

Figure 1- figure supplement 1

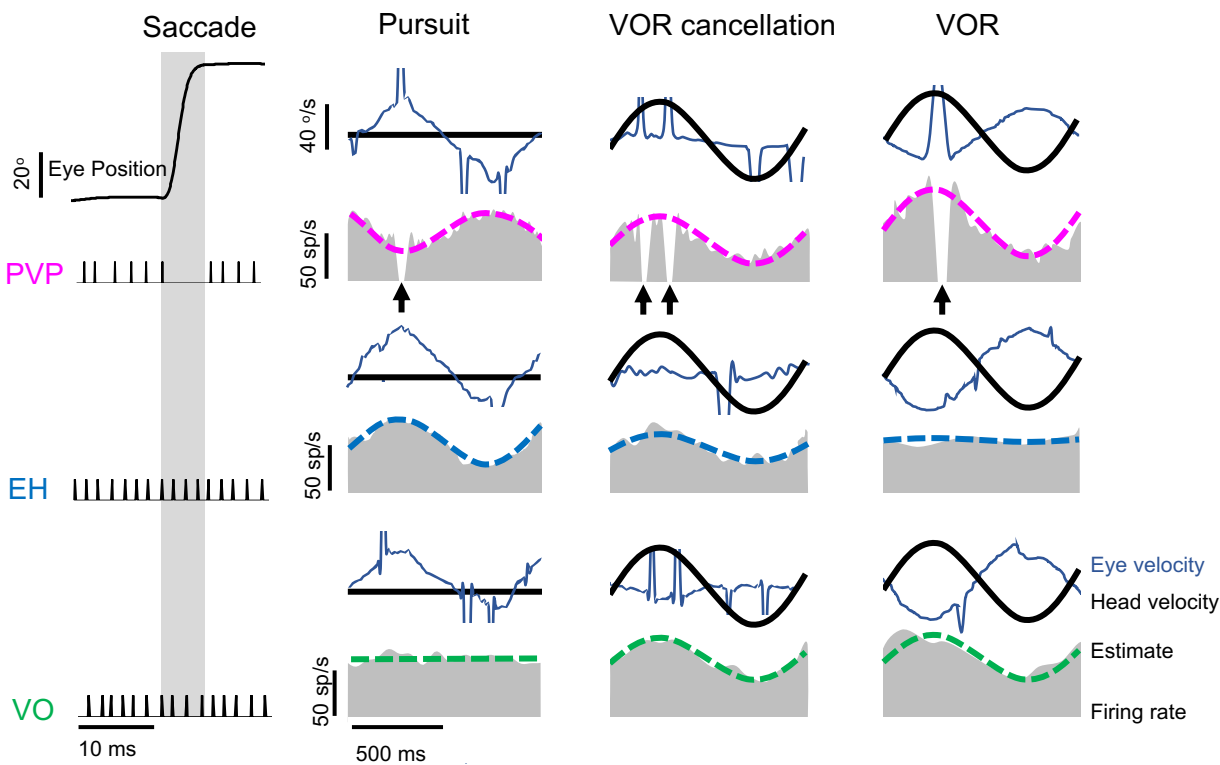

Supplement: supp [file elife-57484-supp-v1.zip › elife_poa_e57484_Figure_1_figure_supplement_1.pdf]

Figure 1 - figure supplement 2

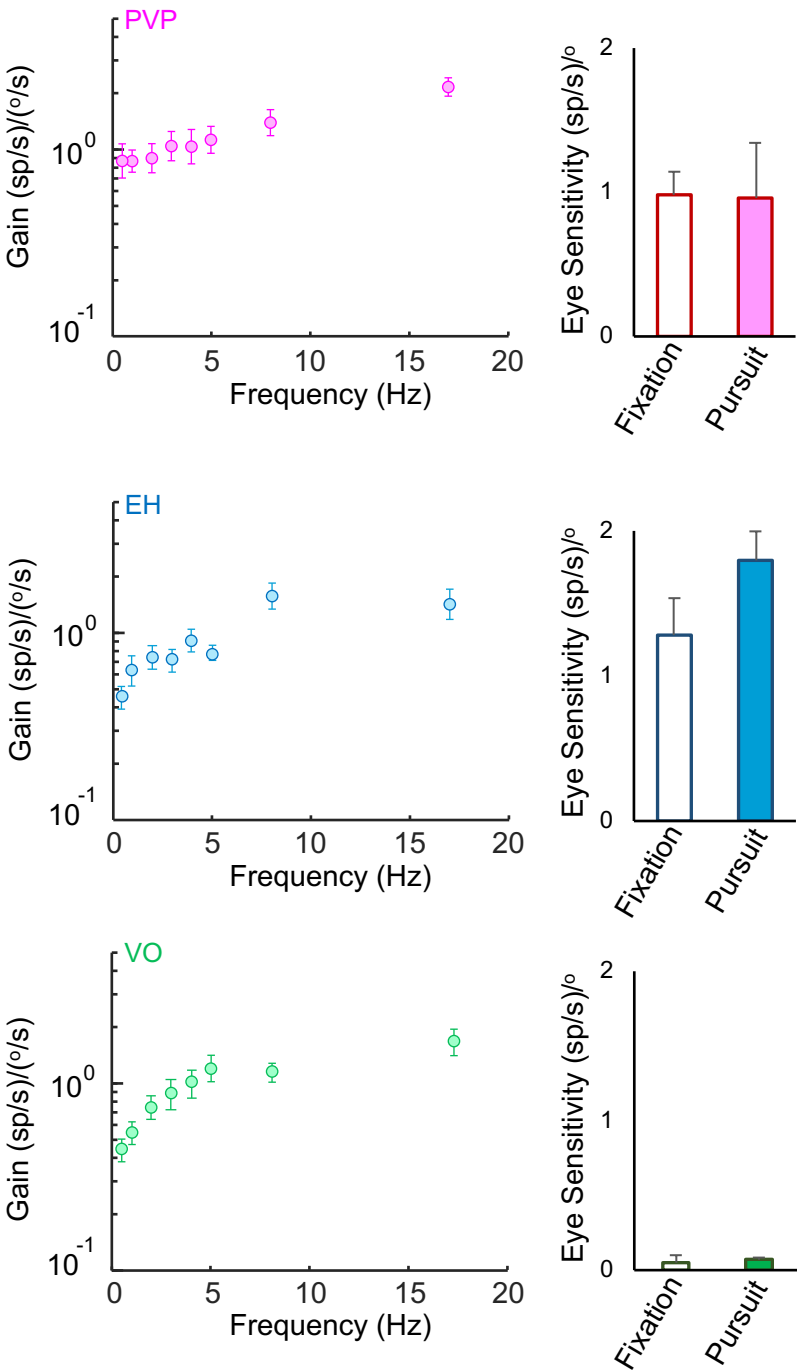

Supplement: supp [file elife-57484-supp-v1.zip › elife_poa_e57484_Figure_1_figure_supplement_2.pdf]

Figure 2 – figure supplement 1

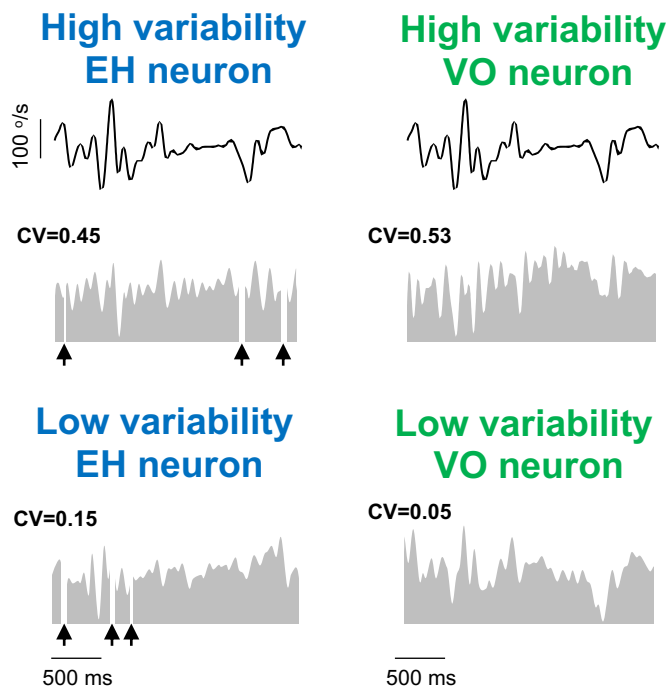

Supplement: supp [file elife-57484-supp-v1.zip › elife_poa_e57484_Figure_2_figure_supplement_1.pdf]

Figure 2 – figure supplement 2

A

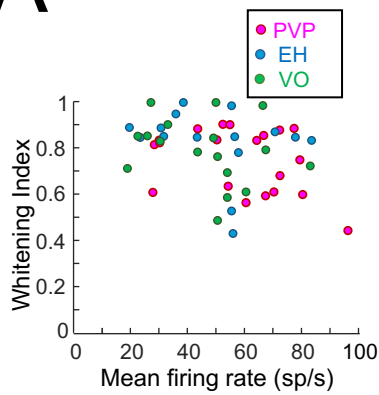

B

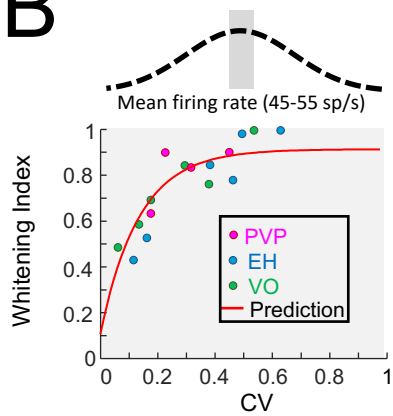

Supplement: supp [file elife-57484-supp-v1.zip › elife_poa_e57484_Figure_2_figure_supplement_2.pdf]

Figure 2 - figure supplement 3

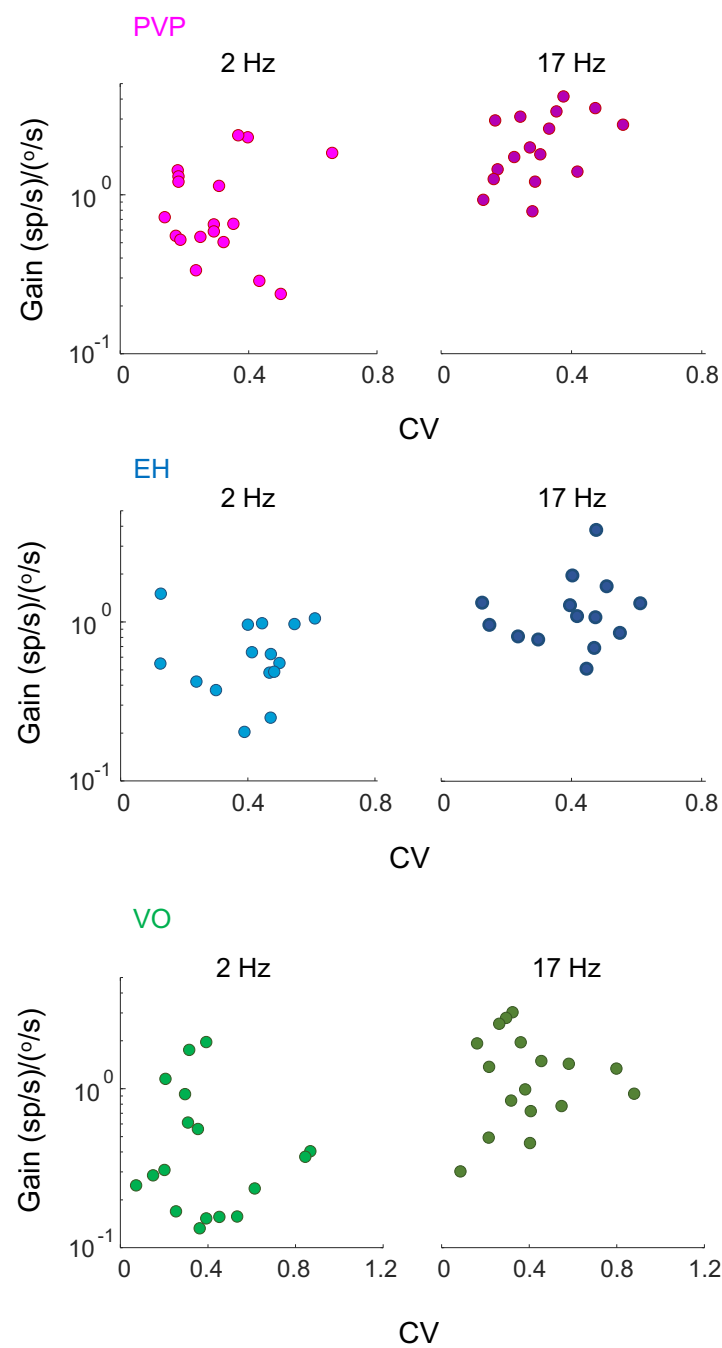

Supplement: supp [file elife-57484-supp-v1.zip › elife_poa_e57484_Figure_2_figure_supplement_3.pdf]

Figure 2- figure supplement 5

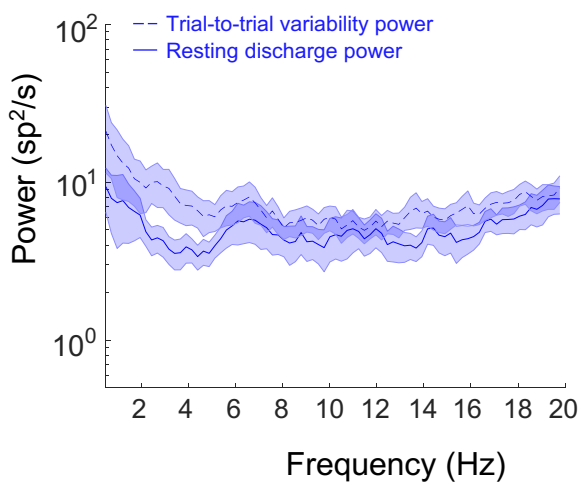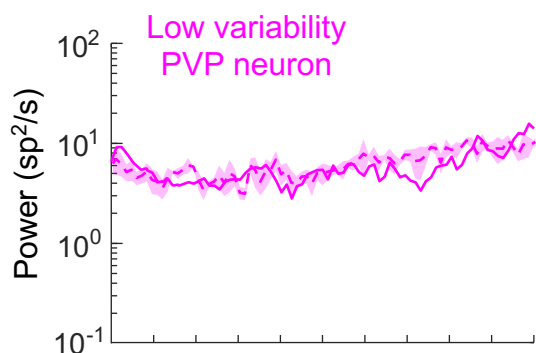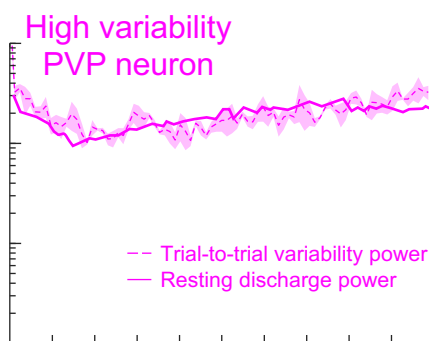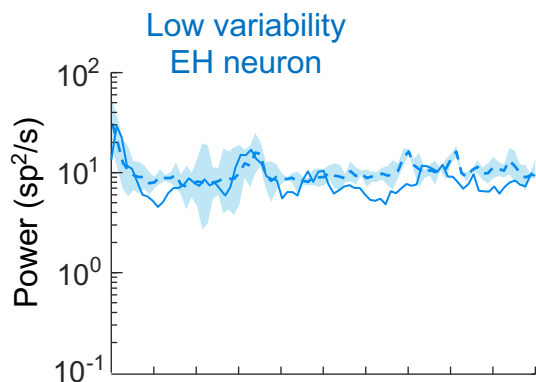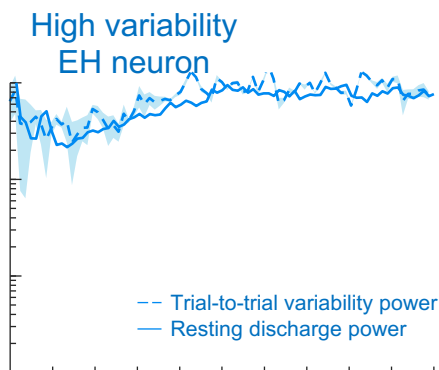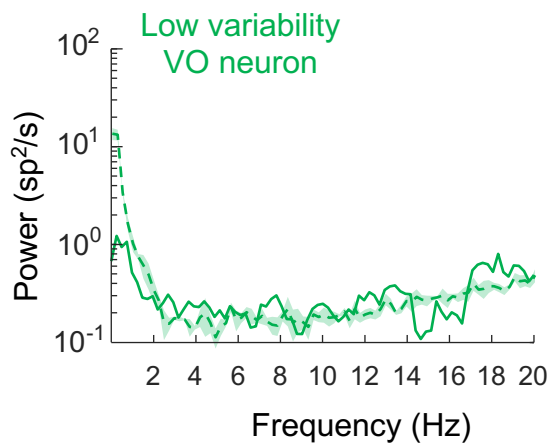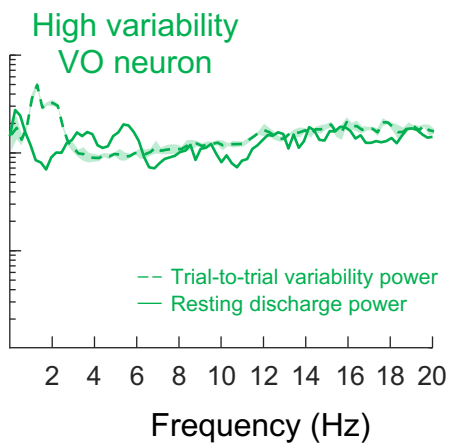

Supplement: supp [file elife-57484-supp-v1.zip › elife_poa_e57484_Figure_2_figure_supplement_5.pdf]

Figure 2 – figure supplement 6

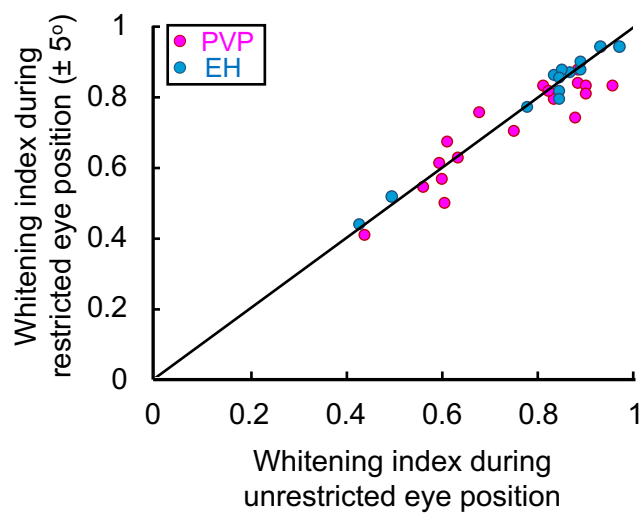

Supplement: supp [file elife-57484-supp-v1.zip › elife_poa_e57484_Figure_2_figure_supplement_6.pdf]

Figure 2- figure supplement 7

**A**

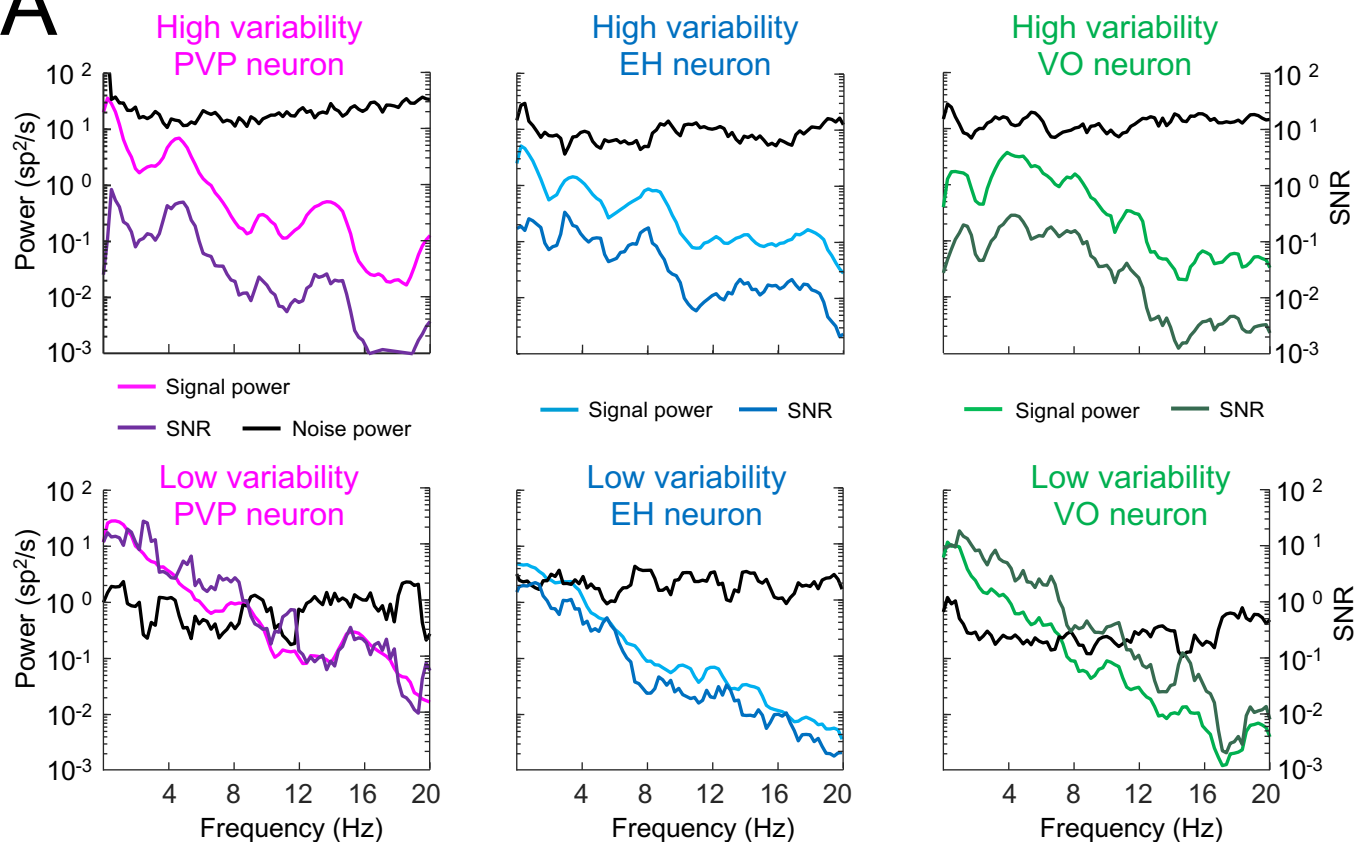

**B**

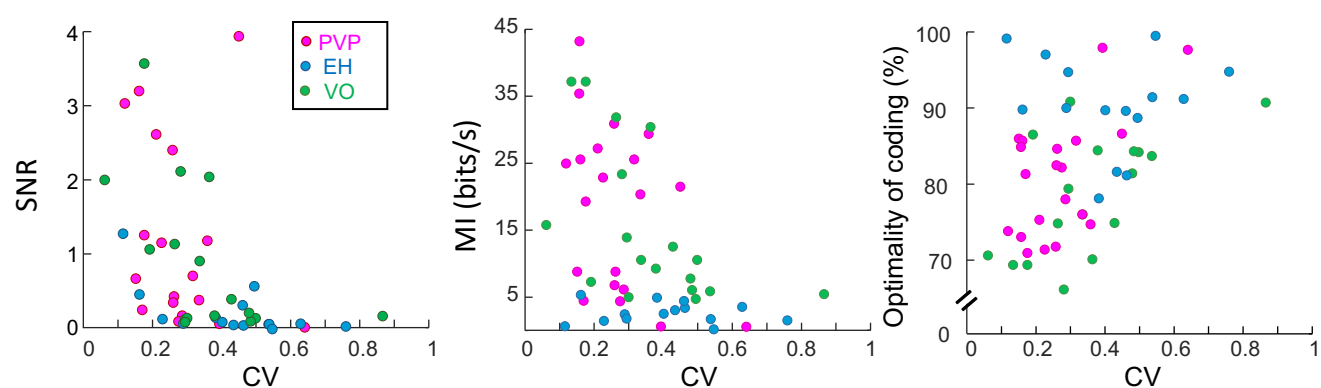

Supplement: supp [file elife-57484-supp-v1.zip › elife_poa_e57484_Figure_2_figure_supplement_7.pdf]

Figure 3 – figure supplement 1

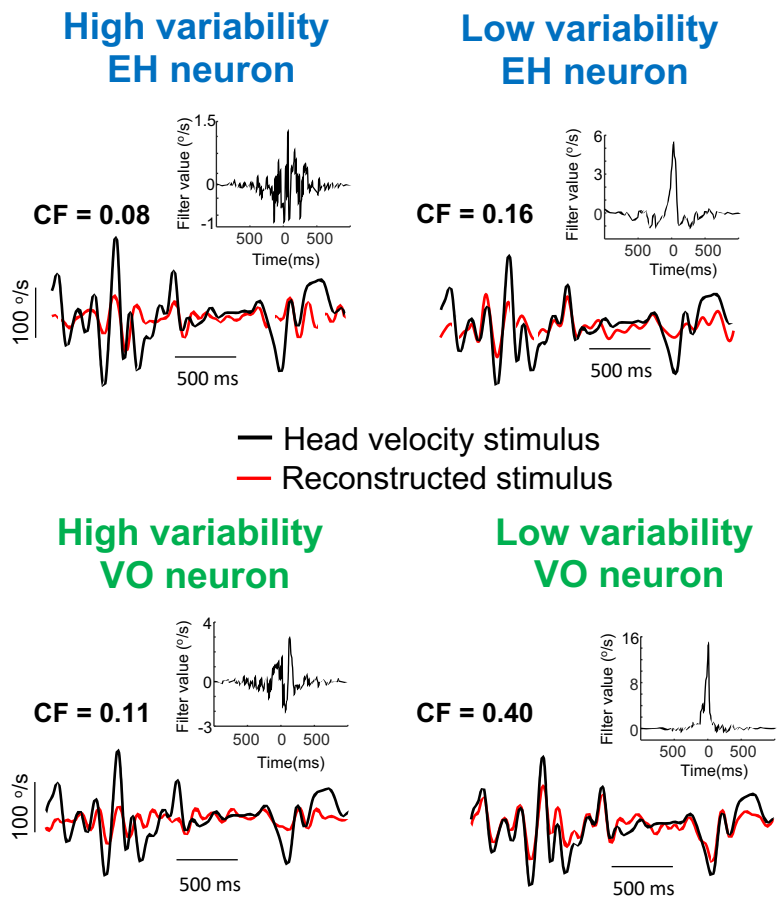

Supplement: supp [file elife-57484-supp-v1.zip › elife_poa_e57484_Figure_3_figure_supplement_1.pdf]

Figure 3 – figure supplement 2

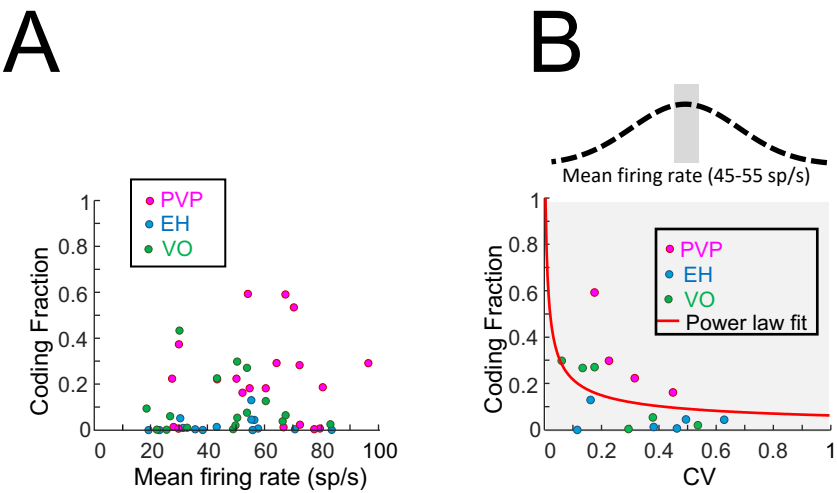

Supplement: supp [file elife-57484-supp-v1.zip › elife_poa_e57484_Figure_3_figure_supplement_2.pdf]

Figure 4 – figure supplement 1

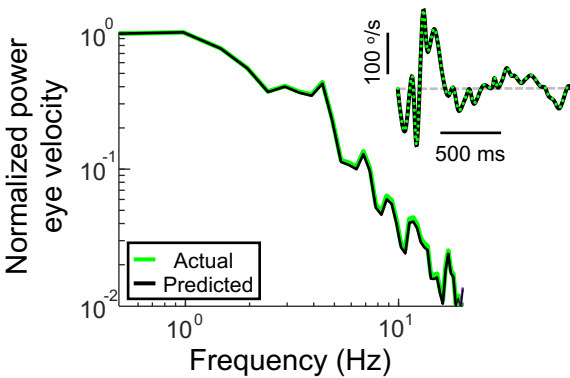

Supplement: supp [file elife-57484-supp-v1.zip › elife_poa_e57484_Figure_4_figure_supplement_1.pdf]

Figure 4 – figure supplement 2

A

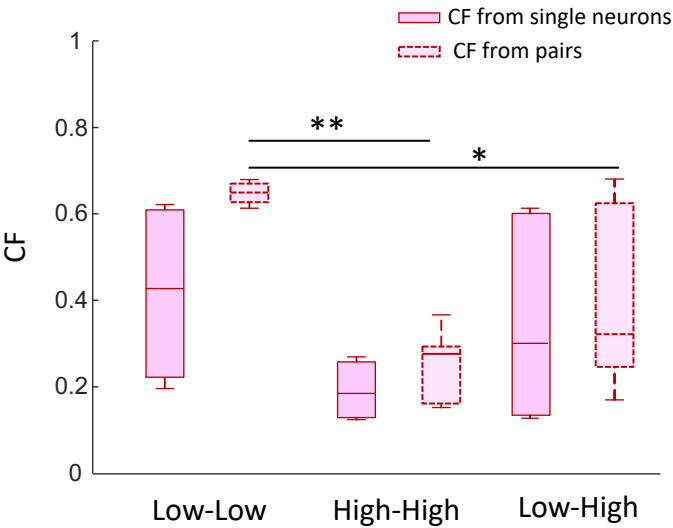

B

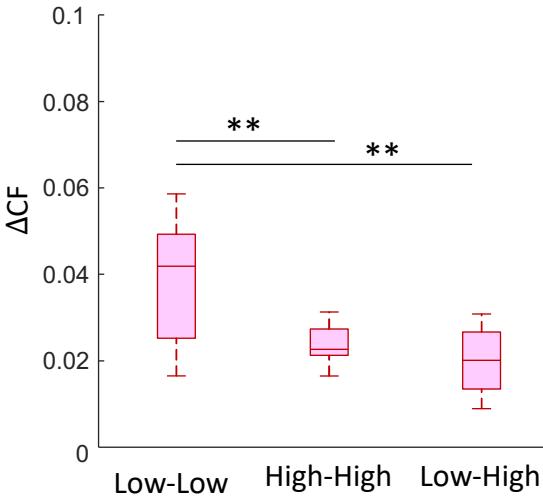

Supplement: supp [file elife-57484-supp-v1.zip › elife_poa_e57484_Figure_4_figure_supplement_2.pdf]

Figure 4 – figure supplement 3

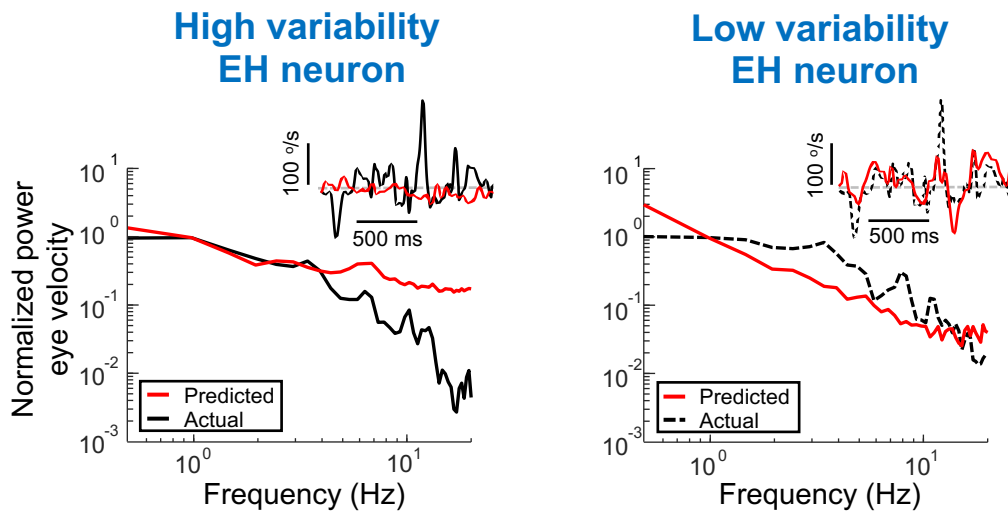

Supplement: supp [file elife-57484-supp-v1.zip › elife_poa_e57484_Figure_4_figure_supplement_3.pdf]
